# Supplementary material
Source: ML conference proceedings conference paper supplement (https://openaccess.thecvf.com/content/CVPRW_2020/html/Wang_Score-CAM_Score-Weighted_Visual_CVPRW_2020_paper.html)
Supplement: Supplementary file 1 [file Wang_Score-CAM_Score-Weighted_Visual_CVPRW_2020_supplemental.pdf]

## Appendix

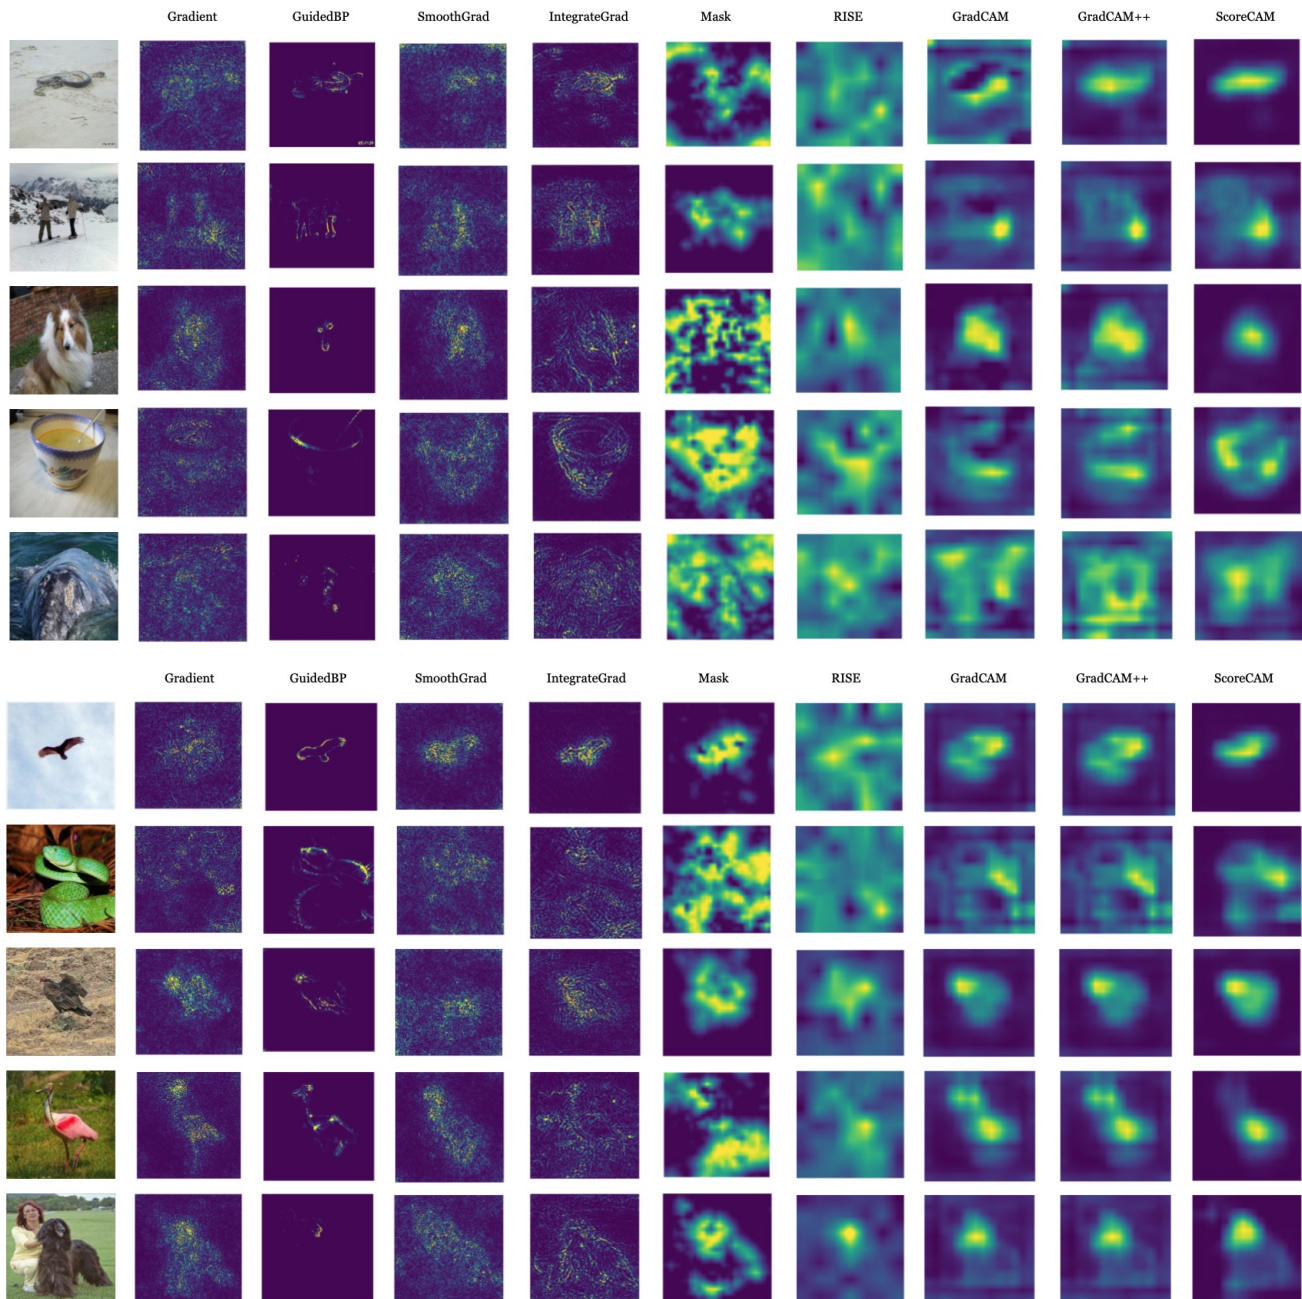

Figure 1. Visualization results on single object.

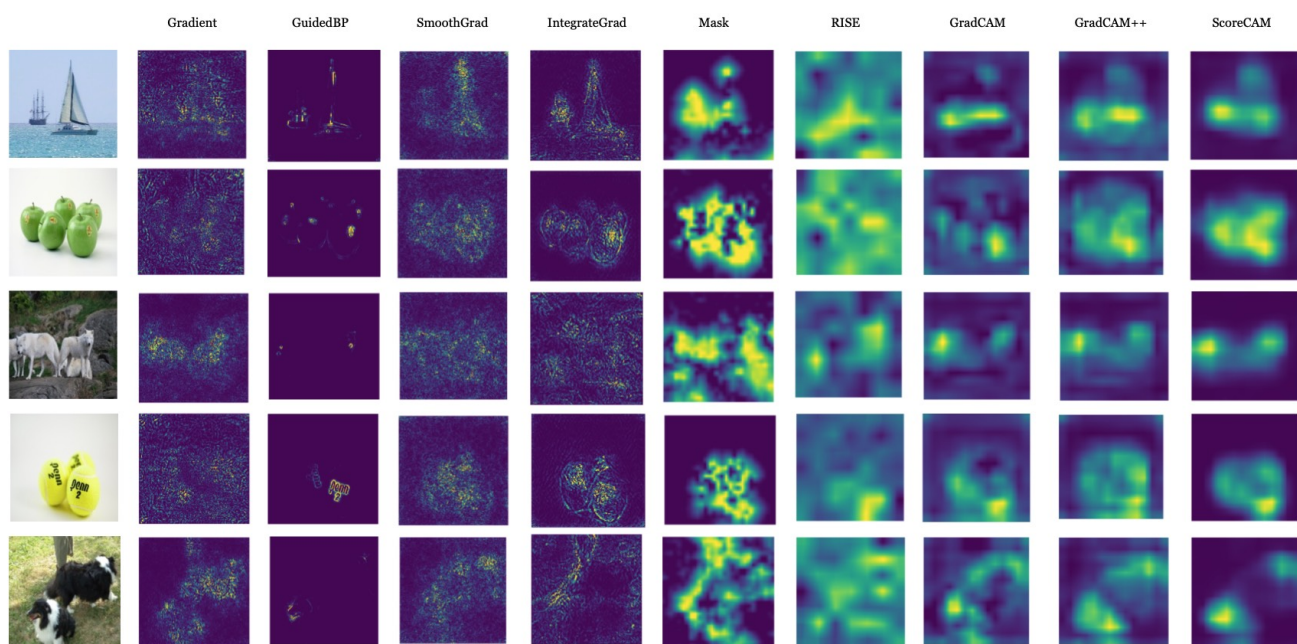

Figure 2. Visualization results on multiple objects.

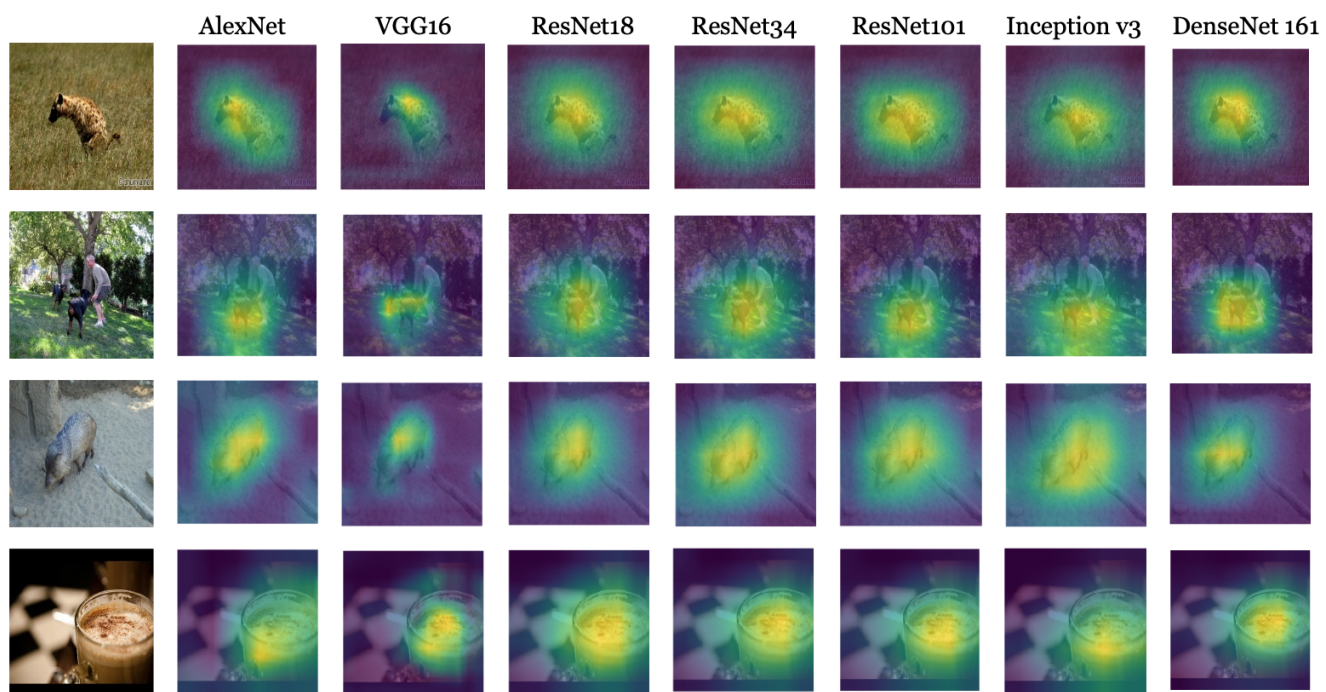

Figure 3. Score-CAM results on other model architectures.

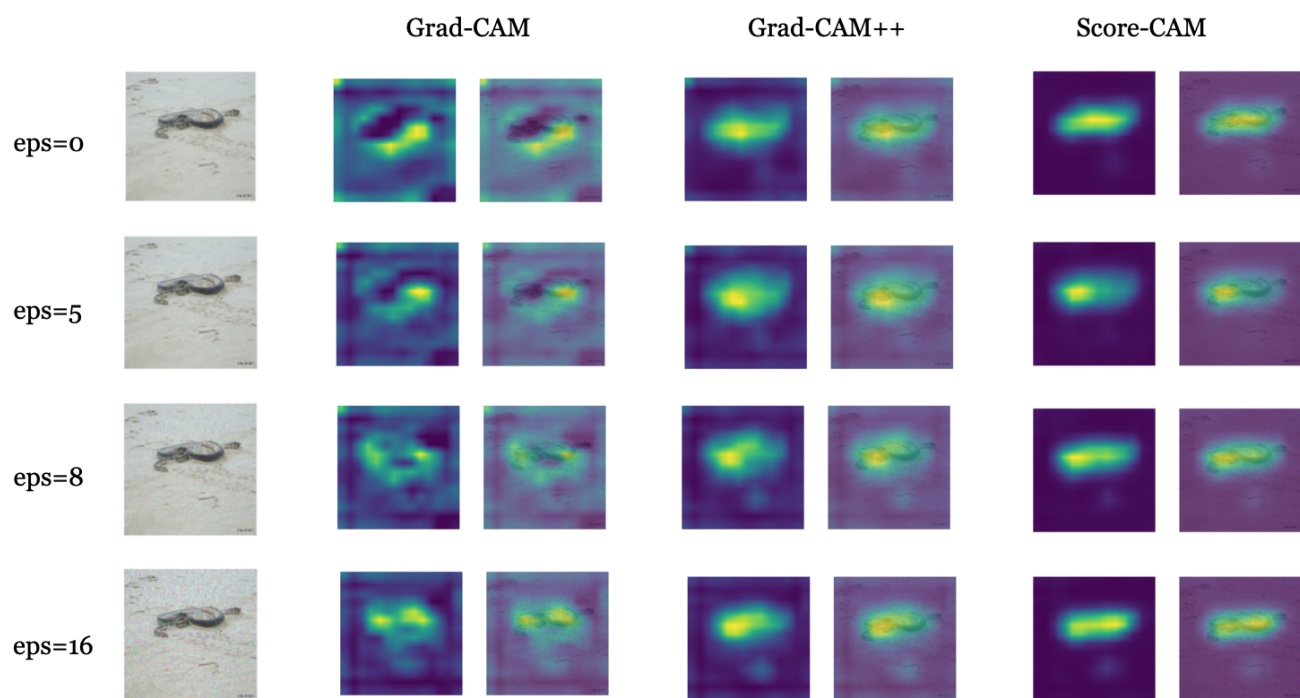

Figure 4. Visualization comparison under noise. Fast gradient sign method(FGSM) is adopted to generate adversarial noises on input. 'eps' is the scale of noise. As shown, Score-CAM shows best performance to sustain noise in input.
